# Supplementary material for: Cosas que nunca pensamos
Source: MDPI journal article supplement (doi:10.3390/antiox12040923), 2013-01-01
Supplement: s1 [file s1]

Table. S1. The application of primers in qRT-PCR

| Gene      | Gene ID | Accession      | Sequence | (5'->3')                 |
|-----------|---------|----------------|----------|--------------------------|
| KDELC2    | 143888  | NM_001363503.2 | F        | TGGAGCATCGAAAAGTCAATGG   |
|           |         |                | R        | CATACGTTGGAAGGACAACATCT  |
| ZEB-2     | 9839    | NM_014795.4    | F        | AAGCCAGGGACAGATCAGC      |
|           |         |                | R        | GCCACACTCTGTGCATTTG      |
| CHOP      | 1649    | NM_001413642.1 | F        | CTCTGACTGGAATCTGGAGAGTG  |
|           |         |                | R        | CTGAGTCATTGCCTTTCTCCTTCG |
| PERK      | 9451    | NM_001313915.2 | F        | ACGATGAGACAGAGTTGCGAC    |
|           |         |                | R        | ATCCAAGGCAGCAATTCTCCC    |
| POFUT1    | 23509   | NM_015352.2    | F        | CTGATGACCCGATGGTAAGC     |
|           |         |                | R        | AAGCCTCCTTTCACCAACCT     |
| sXBP1     | 22433   | NM_005080.4    | F        | CTGAGTCCGAATCAGGTGCAG    |
|           |         |                | R        | ATCCATGGGGAGATGTTCTGG    |
| ATF4      | 468     | NM_182810.3    | F        | GTTCTCCAGCGACAAGGCTA     |
|           |         |                | R        | ATCCTGCTTGCTGTTGTTGG     |
| Grp78/BiP | 3309    | NM_005347.5    | F        | TGTTCAACCAATTATCAGCAAATC |
|           |         |                | R        | TTCTGCTGTATCCTCTTCACCAGT |
| EDEM1     | 9695    | NM_014674.3    | F        | CAAGTGTGGGTACGCCACG      |
|           |         |                | R        | AAAGAAGCTCTCCATCCGGTC    |
| LC3B      | 81631   | NM_022818.5    | F        | GATGTCCGACTTATTCGAGAGC   |
|           |         |                | R        | TTGAGCTGTAAGCGCCTTCTA    |
| ATG4b     | 23192   | NM_178326.3    | F        | ATGGACGCAGCTACTCTGAC     |
|           |         |                | R        | TTTTCTACCCAGTATCCAAACGG  |
| SQSTM1    | 8878    | NM_001142298.2 | F        | GCACCCCAATGTGATCTGC      |
|           |         |                | R        | CGCTACACAAGTCGTAGTCTGG   |
| CD11B     | 16409   | NM_001145808.2 | F        | AAGGTGTCCACACTCCAGAAC    |
|           |         |                | R        | GAGGAGCAGTTTGTTTCCAAG    |
| CD206     | 17533   | NM_002438.4    | F        | GGGAAAGGTTACCCTGGTGG     |
|           |         |                | R        | TCAAGGAAGGGTCGGATCGT     |
| TNFA      | 7124    | NM_000594.4    | F        | GTGCTCCTCACCCACACCGTC    |
|           |         |                | R        | CCCTTCTCCAGCTGGAAGAC     |
| MCSF      | 1435    | NM_000757.6    | F        | TCCAAAACACGGGGACCTATC    |
|           |         |                | R        | TCCTCGAACACGACCACCT      |

Table. S2. Characters of antibodies used in western blotting and in IHC.

| <b>Antibody</b>   | <b>Company</b>           | <b>Host</b> | <b>Dilution</b> |
|-------------------|--------------------------|-------------|-----------------|
| KDELC2            | Thermo Fisher Scientific | Rabbit      | 1:500           |
| Actin             | Santacruz                | Mouse       | 1:1000          |
| NLRP3 (D4D8T)     | Cell signaling           | Rabbit      | 1:500           |
| Caspase-1 (D7F10) | Cell signaling           | Rabbit      | 1:500           |
| IL-1 $\beta$      | R&D                      | Mouse       | 1:1000          |
| LC3B              | Sigma-Aldrich            | Rabbit      | 1:1000          |
| P62               | Santacruz                | Mouse       | 1:1000          |
| VEGFR1            | abcam                    | Rabbit      | 1:100           |
| VEGFA             | abcam                    | Mouse       | 1:200           |
